# Supplementary material for: Bacteria-Infected Artificial Urine Characterization Based on a Combined Approach Using an Electronic Tongue Complemented with 1H-NMR and Flow Cytometry
Source: MDPI journal article supplement (doi:10.3390/bios13100916), 2023-10-05
Supplement: s1 [file s1]

# **Bacteria-infected artificial urine characterization based on a combined approach using an electronic tongue complemented with $^1\text{H}$ -NMR and flow cytometry**

Carolin Psotta, Emelie J. Nilsson, Thomas Sjöberg and Magnus Falk\*

Department of Biomedical Science. Faculty of Health and Society. Malmö University.  
Malmö 20506. Sweden

Biofilms-Research Center for Biointerfaces. Malmö University. Malmö 20506. Sweden

\*corresponding author

**Supporting material**

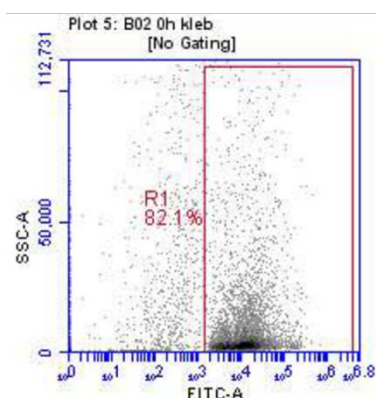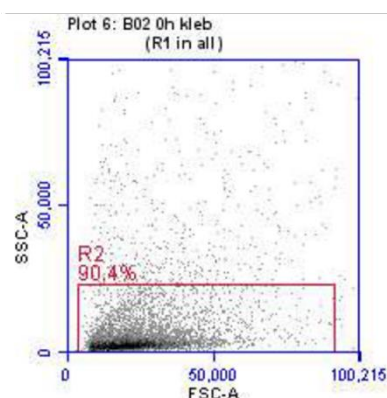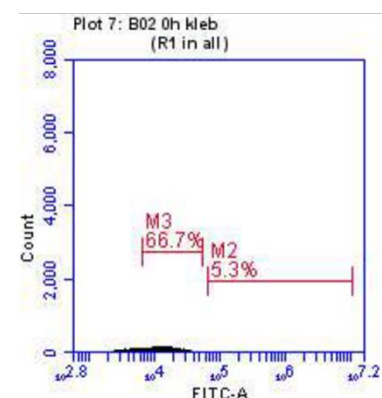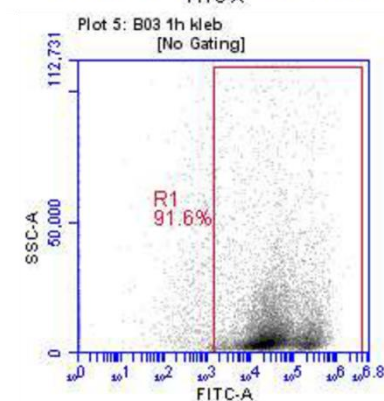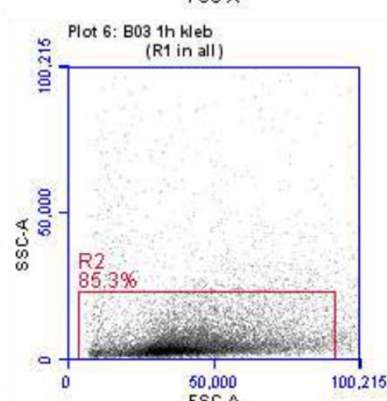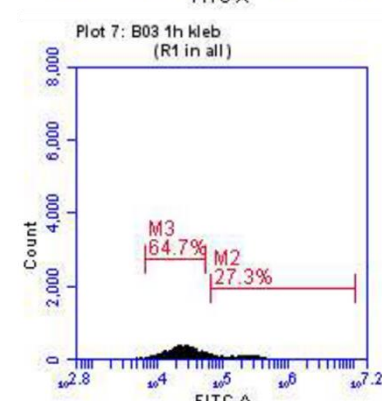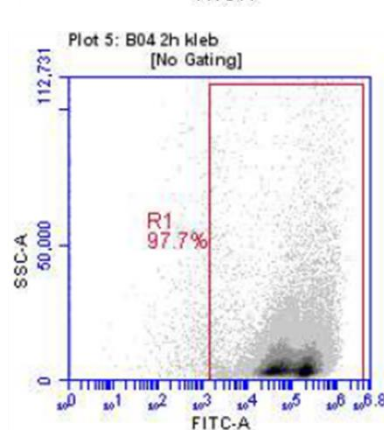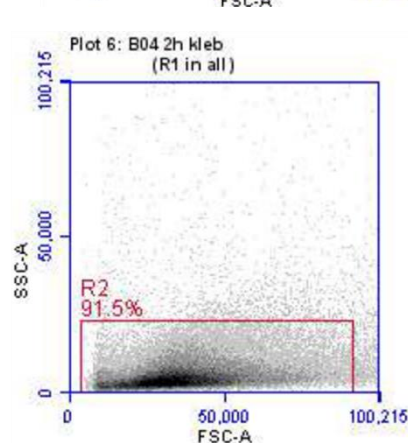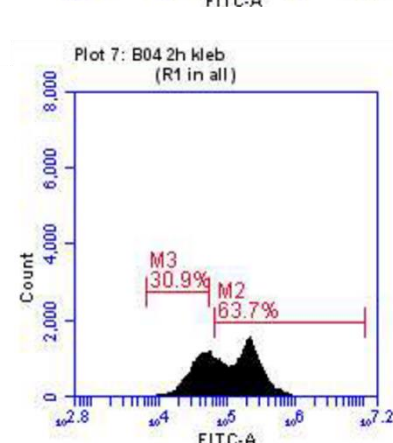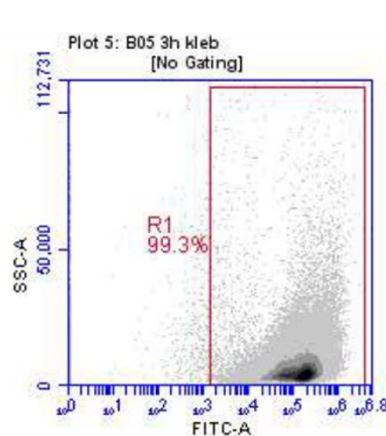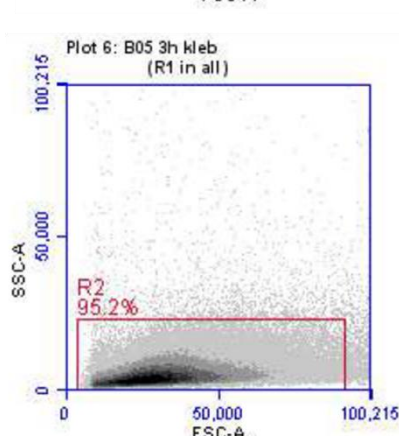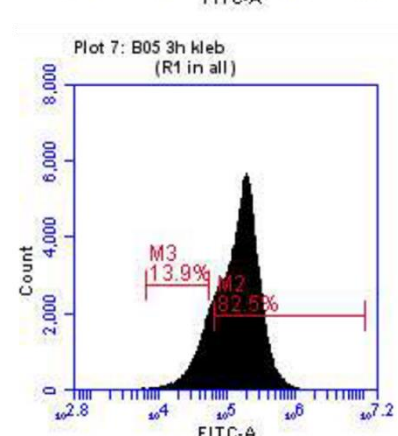

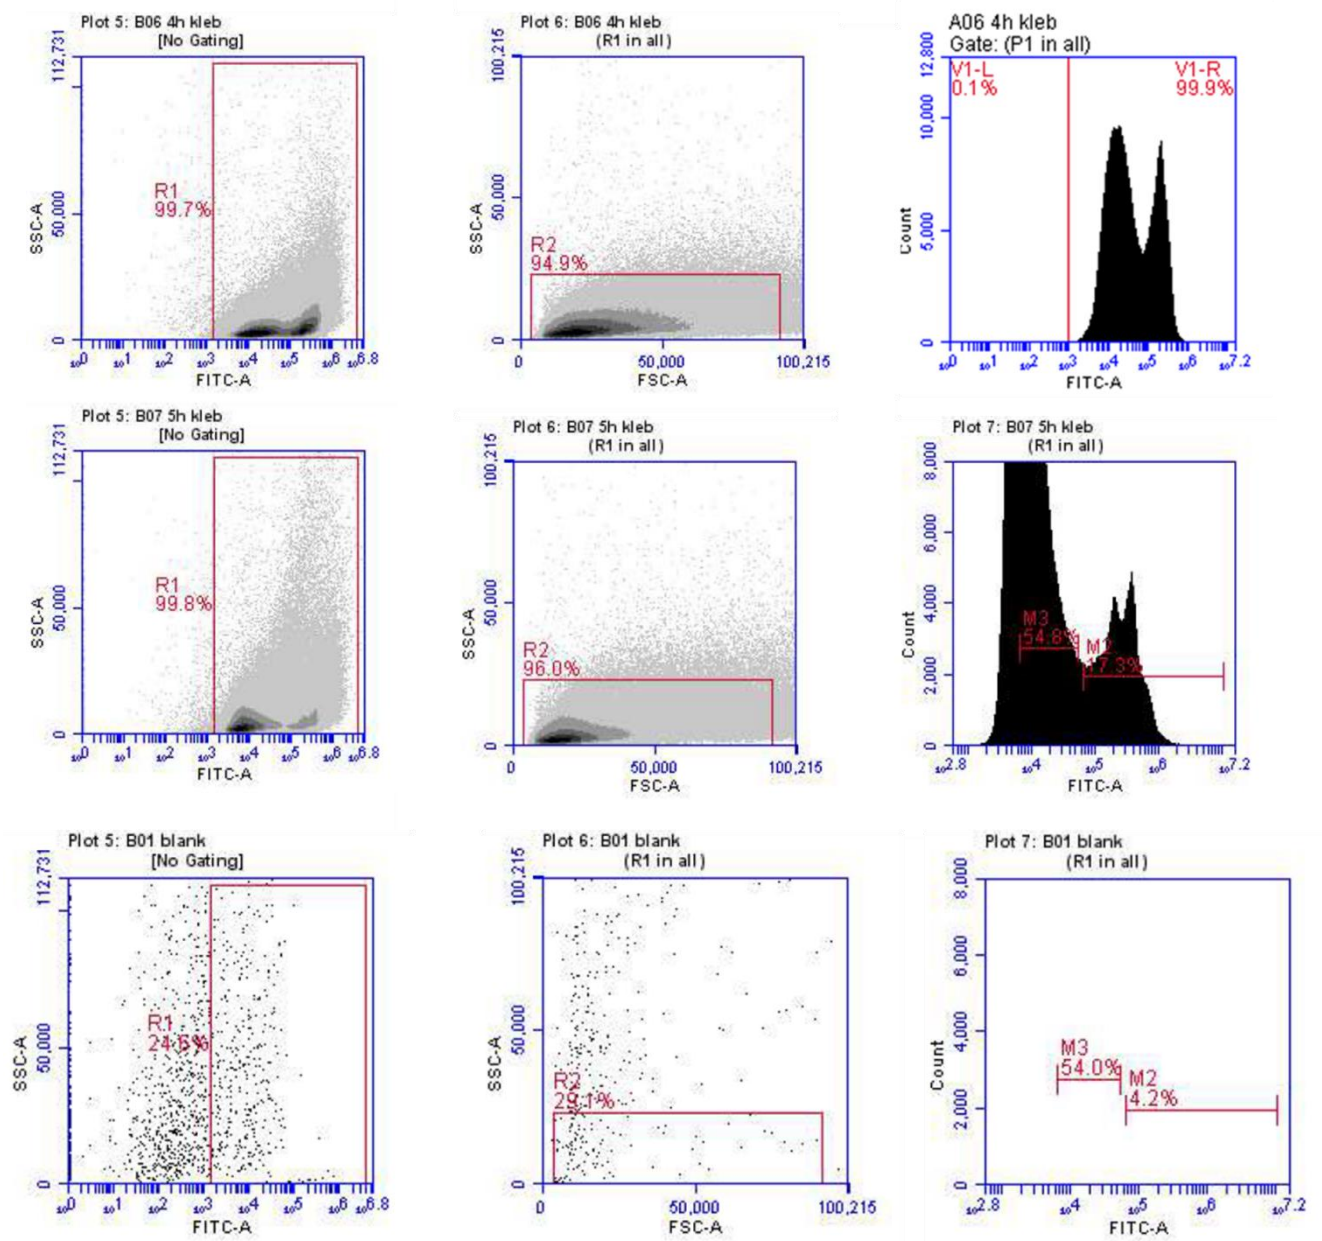

**Supporting Figure S1:** Flow cytometry results for *K.pneumoniae*, displaying FITC-A (Fluorescein isothiocyanate) vs. cell count.

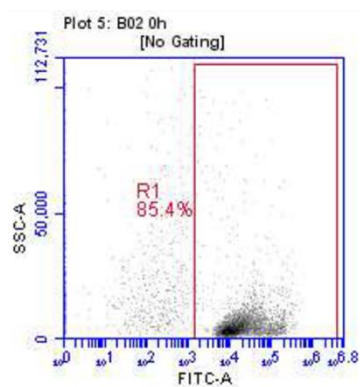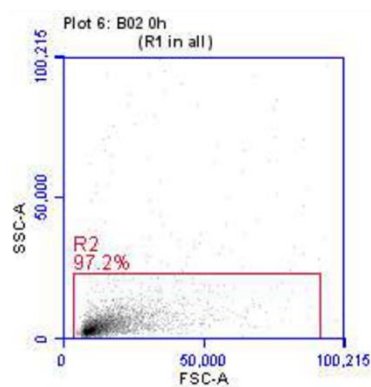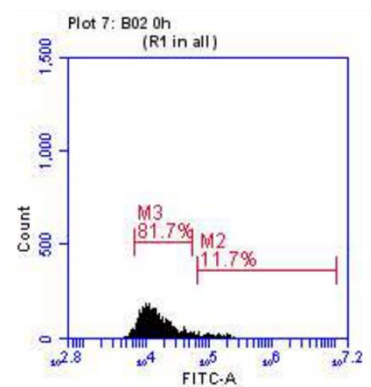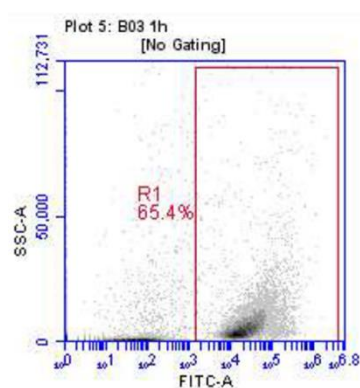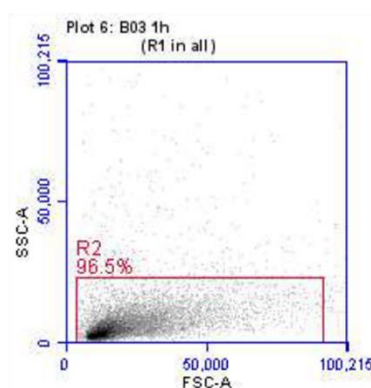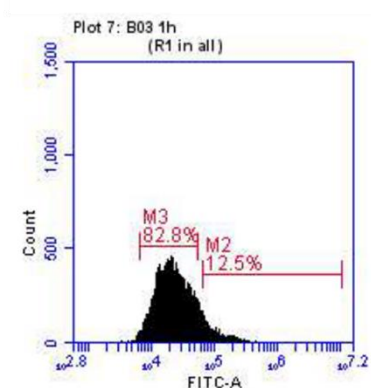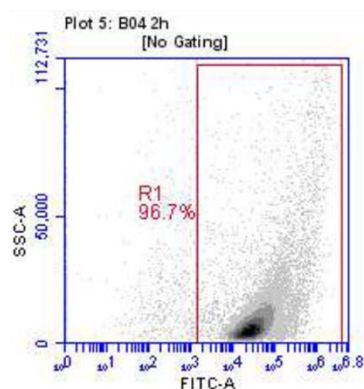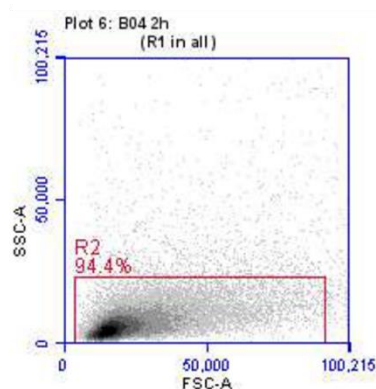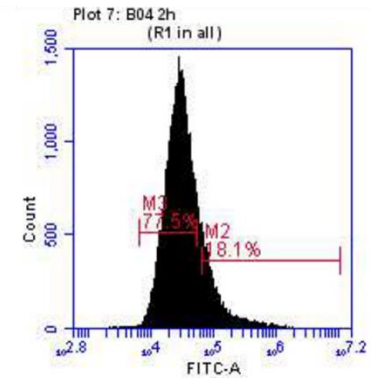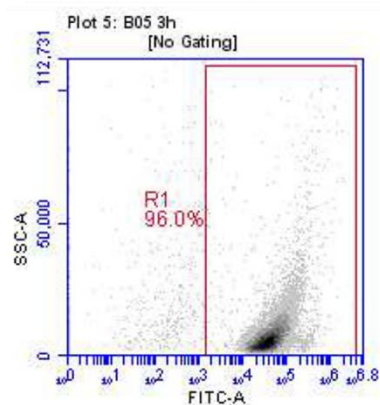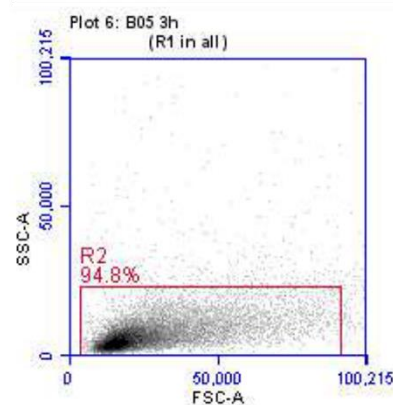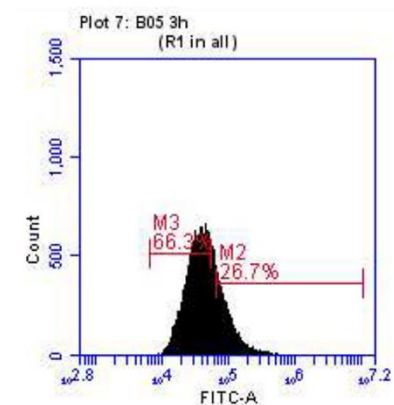



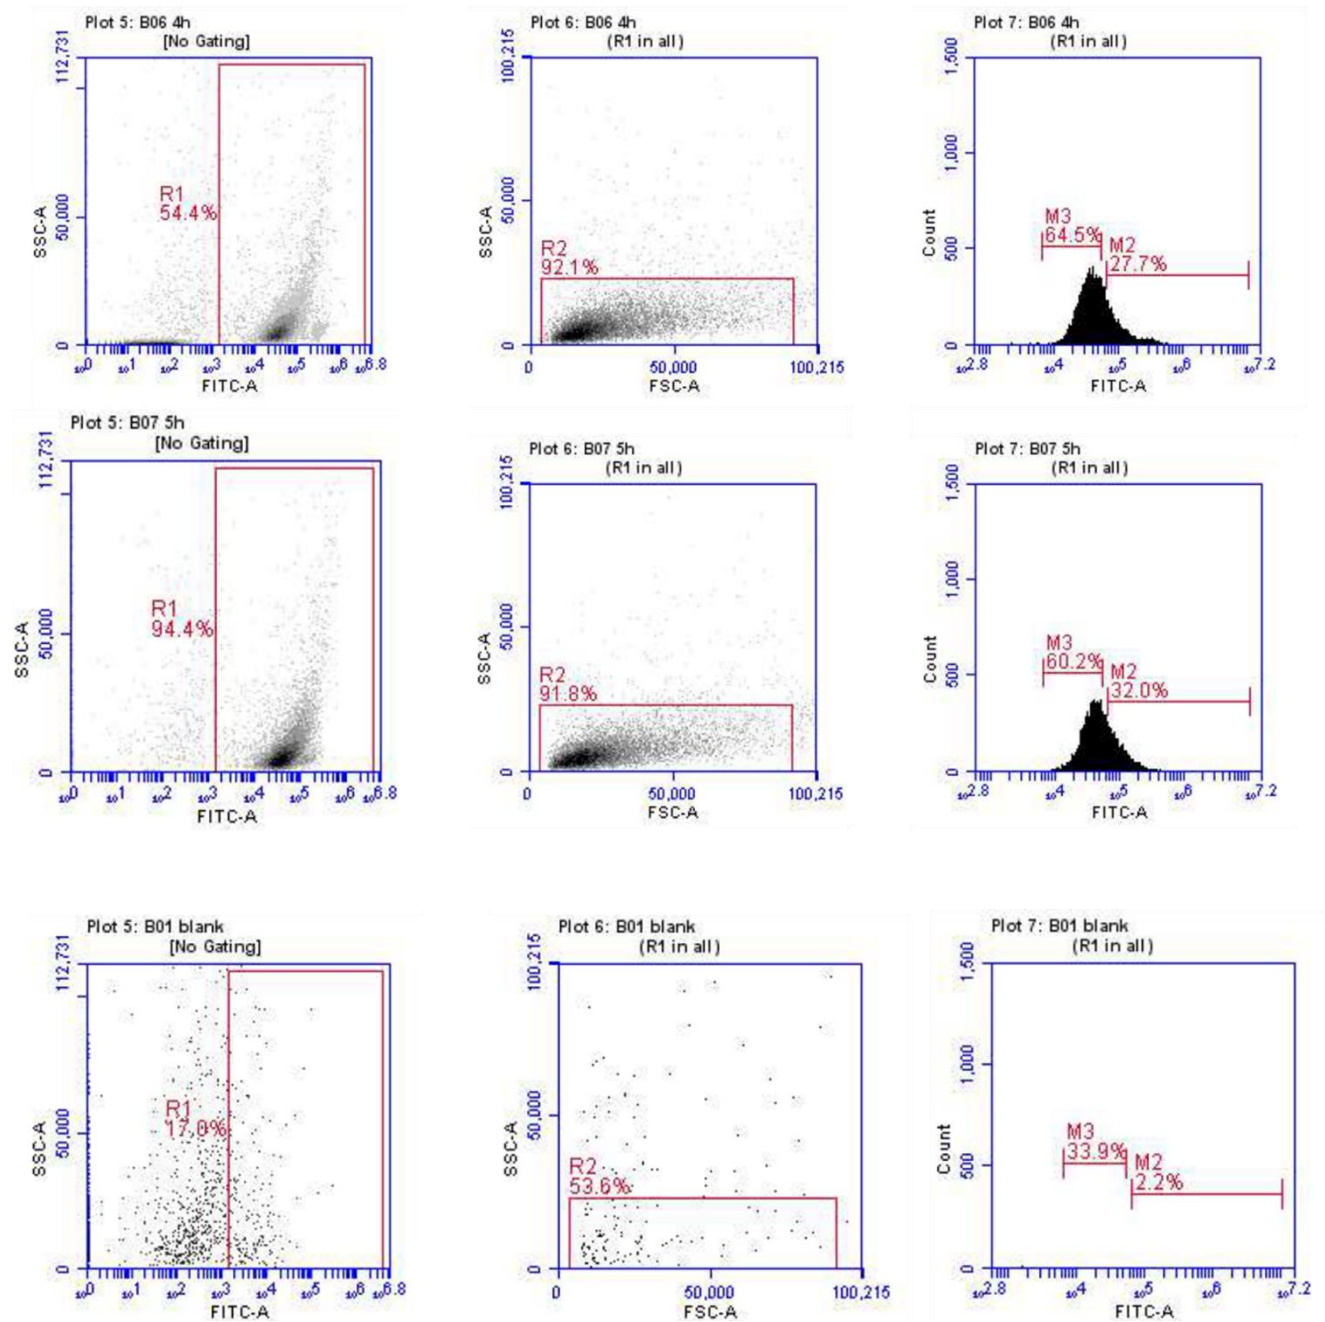

**Supporting Figure S2:** Flow cytometry results for *E. faecalis*, displaying FITC-A (Fluorescein isothiocyanate) vs. cell count.

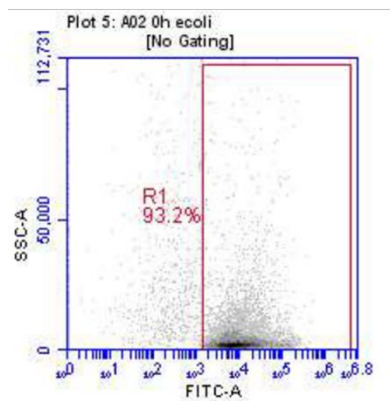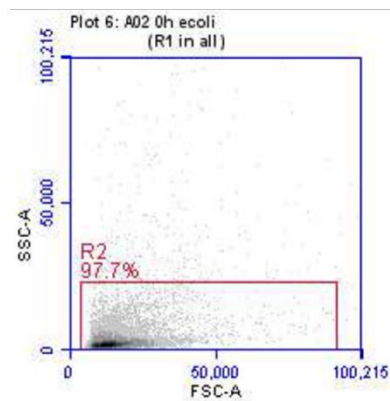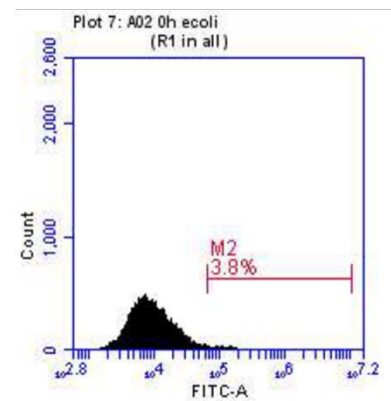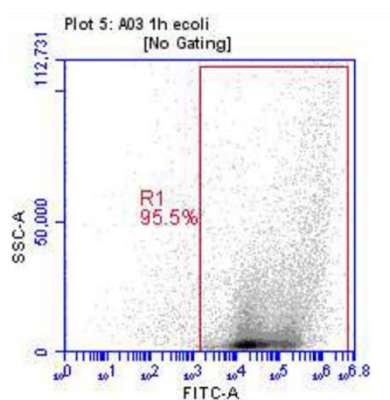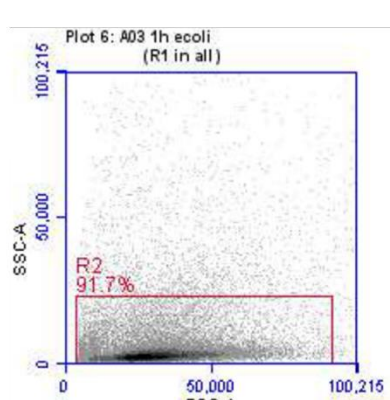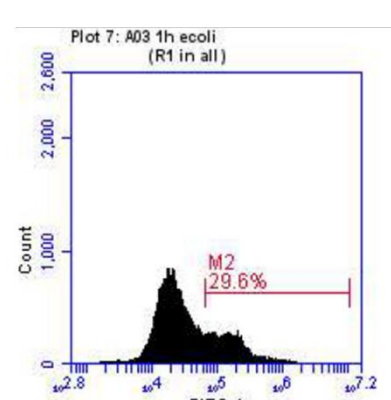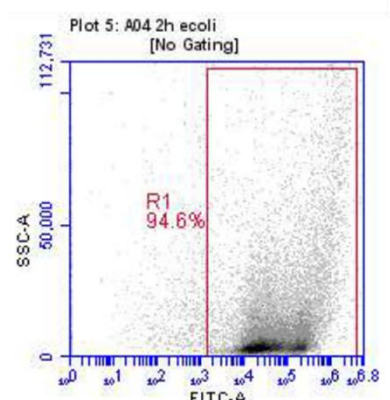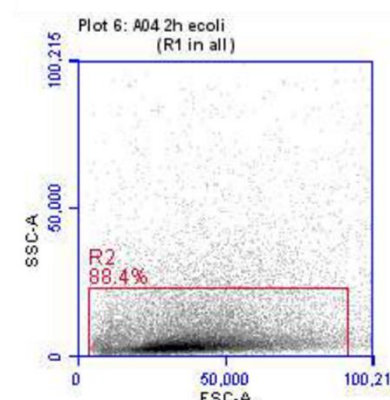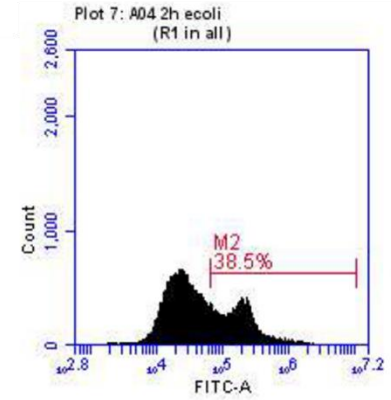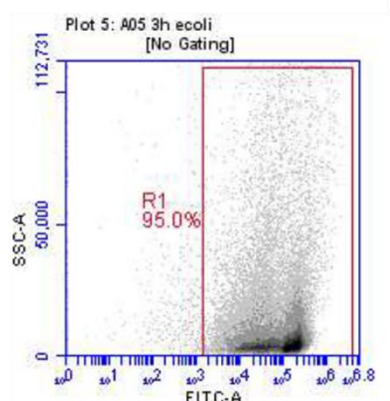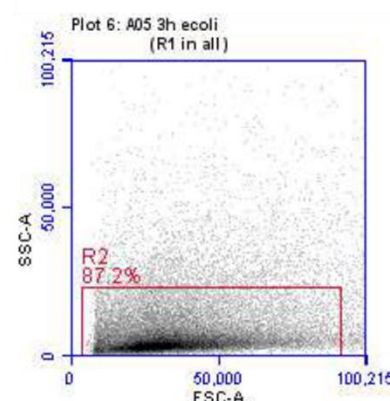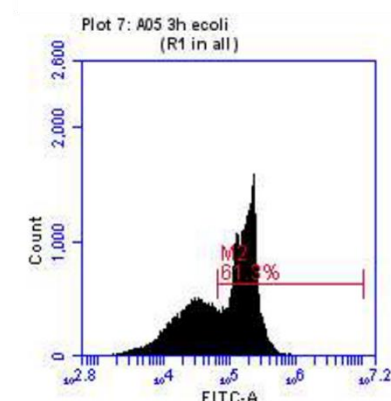

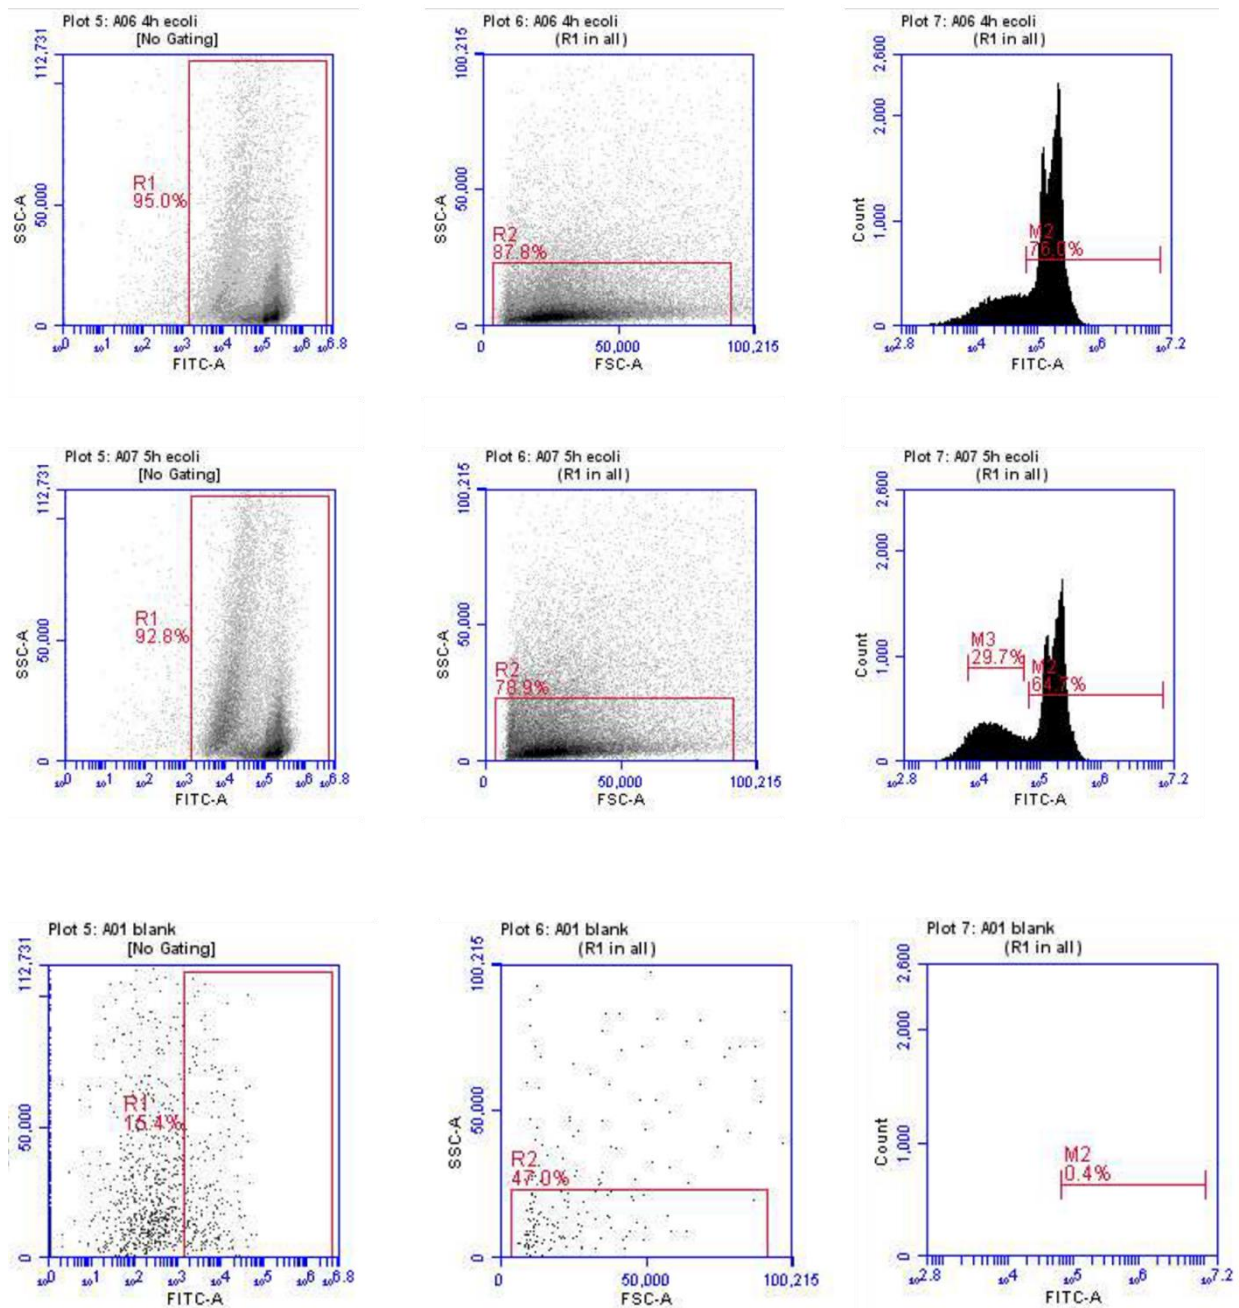

**Supporting Figure S3:** Flow cytometry results for *E. coli*, displaying FITC-A (Fluorescein isothiocyanate) vs. cell count.

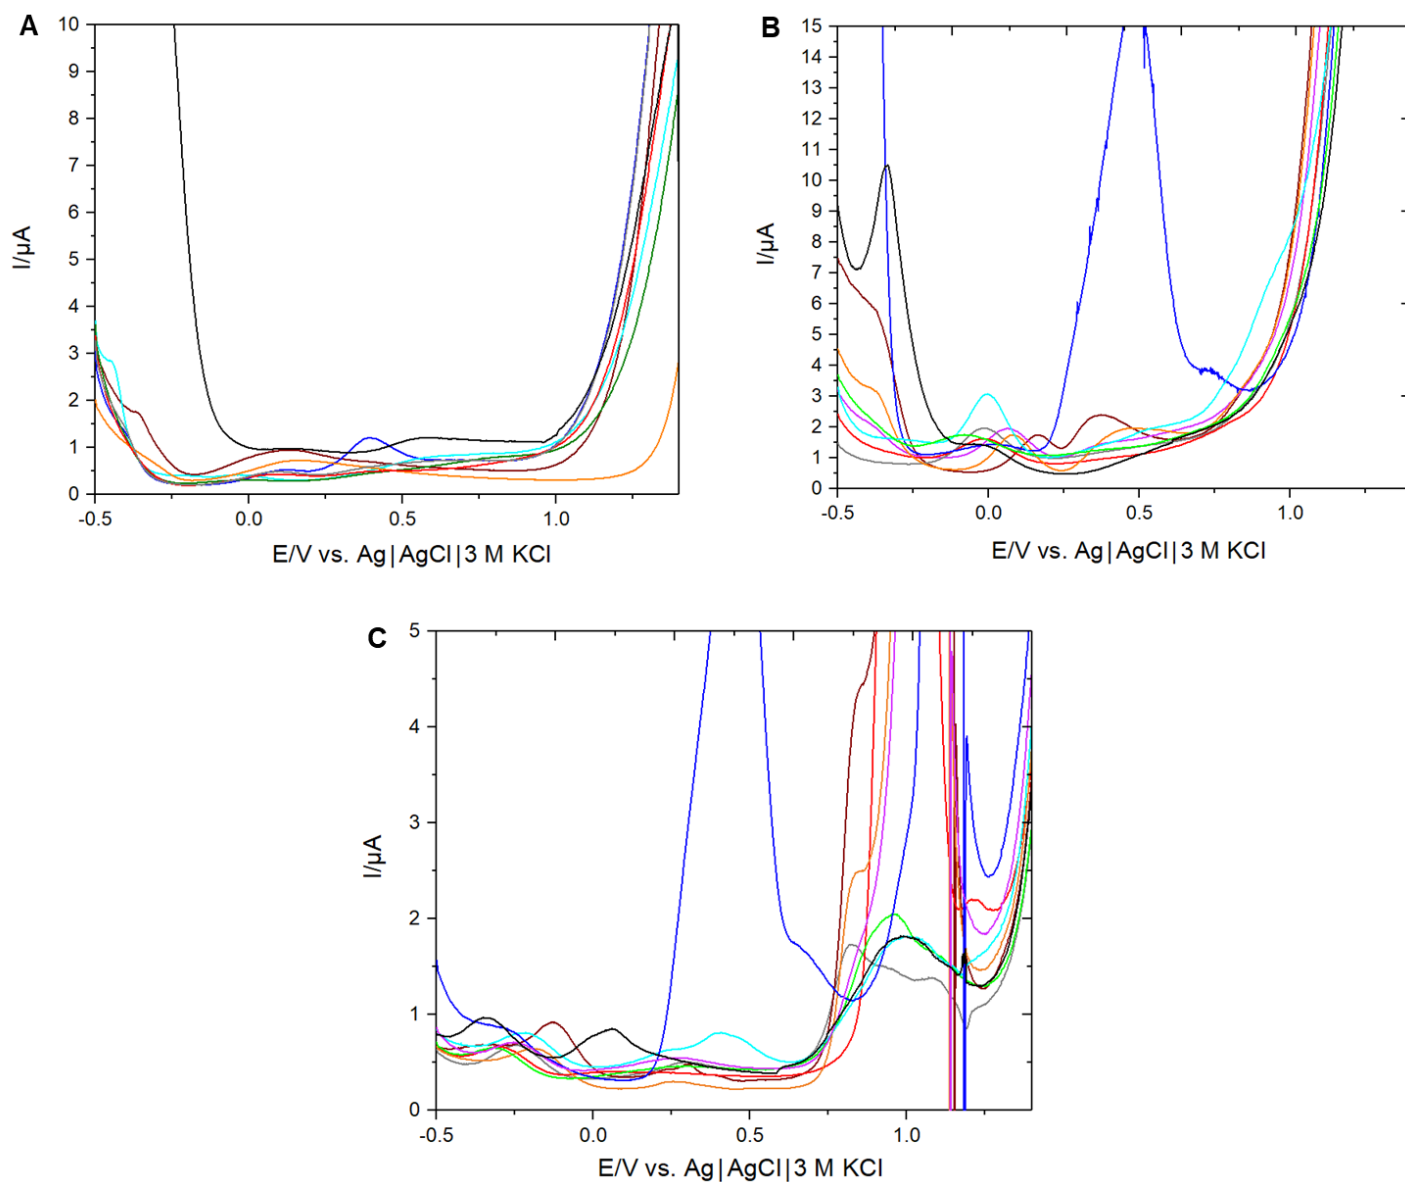

**Supporting Figure S4:** Investigation of Pt (A), Pd (B) and Au (C) electrodes using DPV in PBS and PBS with each of the metabolically relevant compounds in AUM, using the same concentrations as used in AUM (see Table 1, MS): PBS (black), acetic acid (grey), uric acid (dark blue), peptone (green), citric acid (dark red), lactic acid (orange), urea (cyan), creatinine (light red).



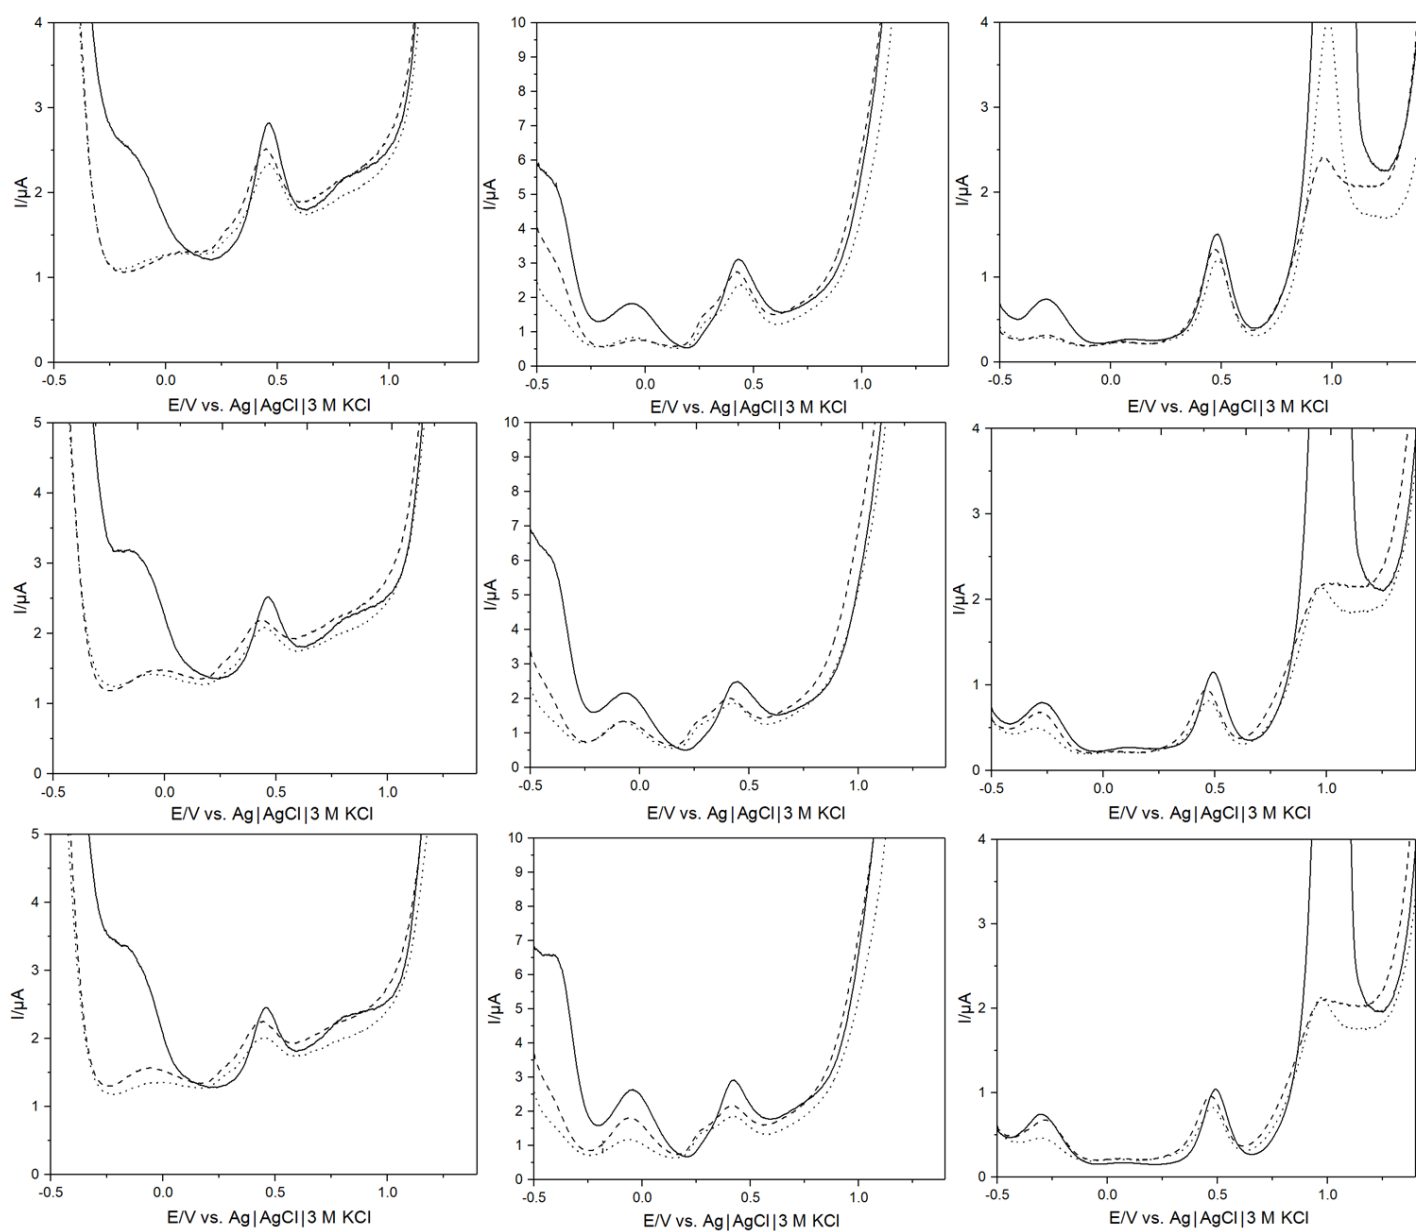

**Supporting Figure S5:** DPV comparing bacteria-infected AUM with the supernatant of the infected solution (solid = AUM; dashed = bacteria; dotted = supernatant): *K.pneumoniae* (top;  $n = 3$ ), *E.faecalis* (middle;  $n = 3$ ), *E.coli* (bottom;  $n = 3$ ) and each electrode material (columns Pt (left) Pd (middle), Au (right)).

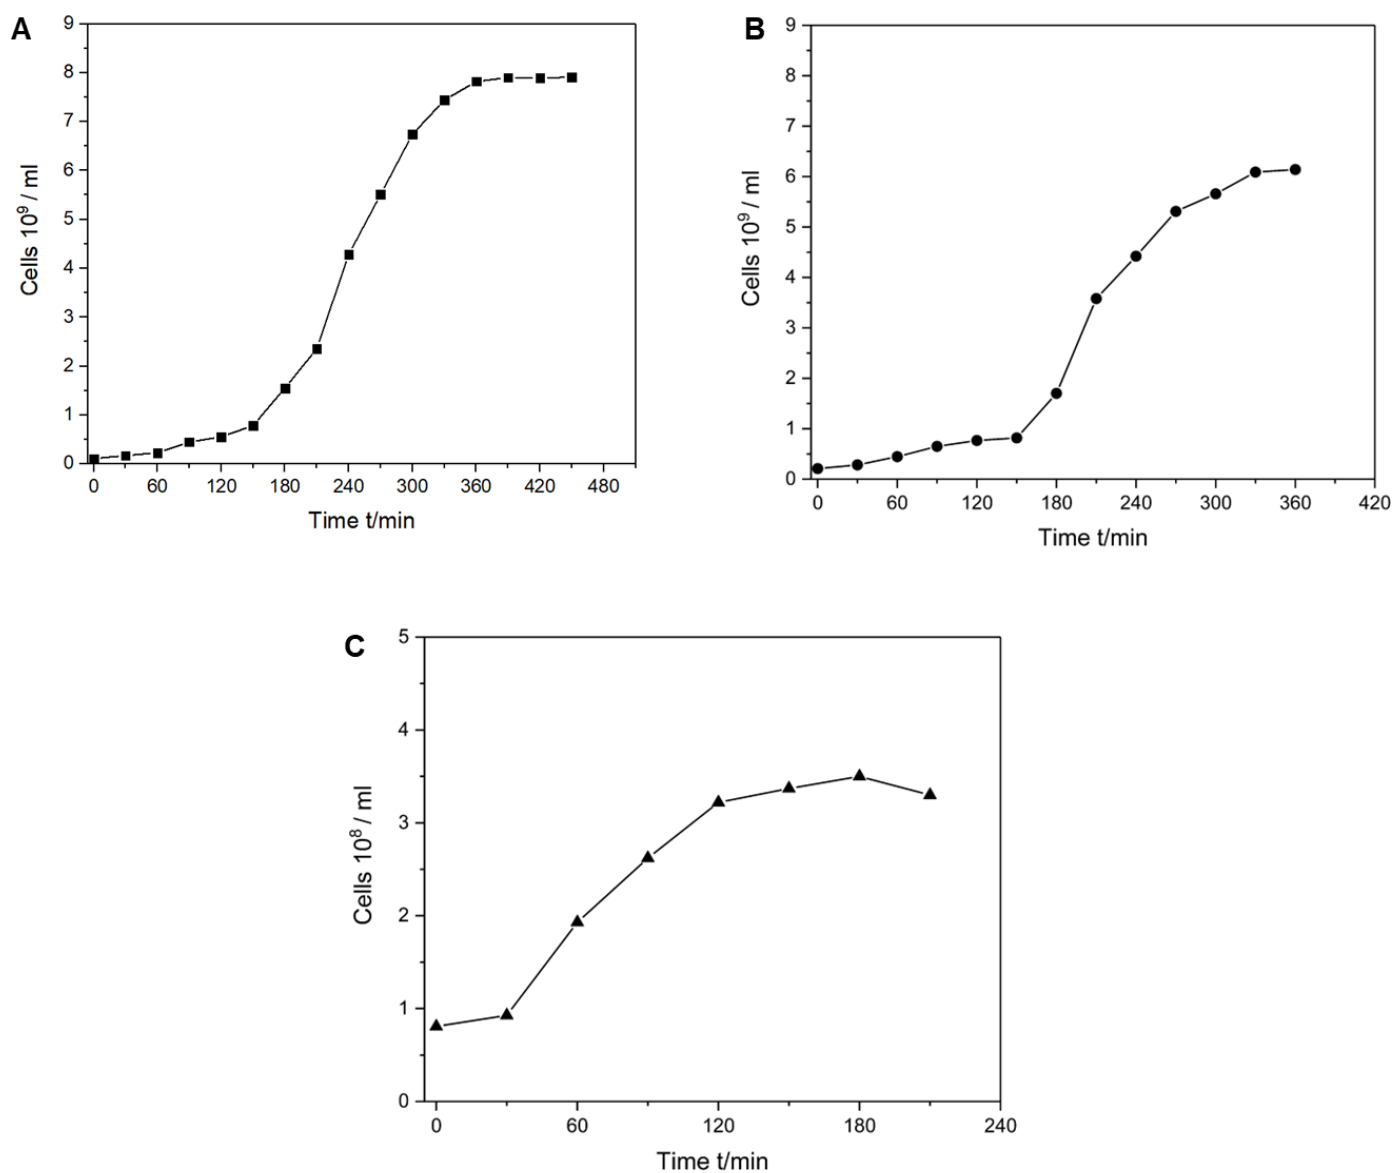

**Supporting Figure S6:** Bacterial growth curves in AUM obtained by measuring the optical density for *K.pneumoniae* (A), *E.coli*. (B) and *E.faecalis* (C)

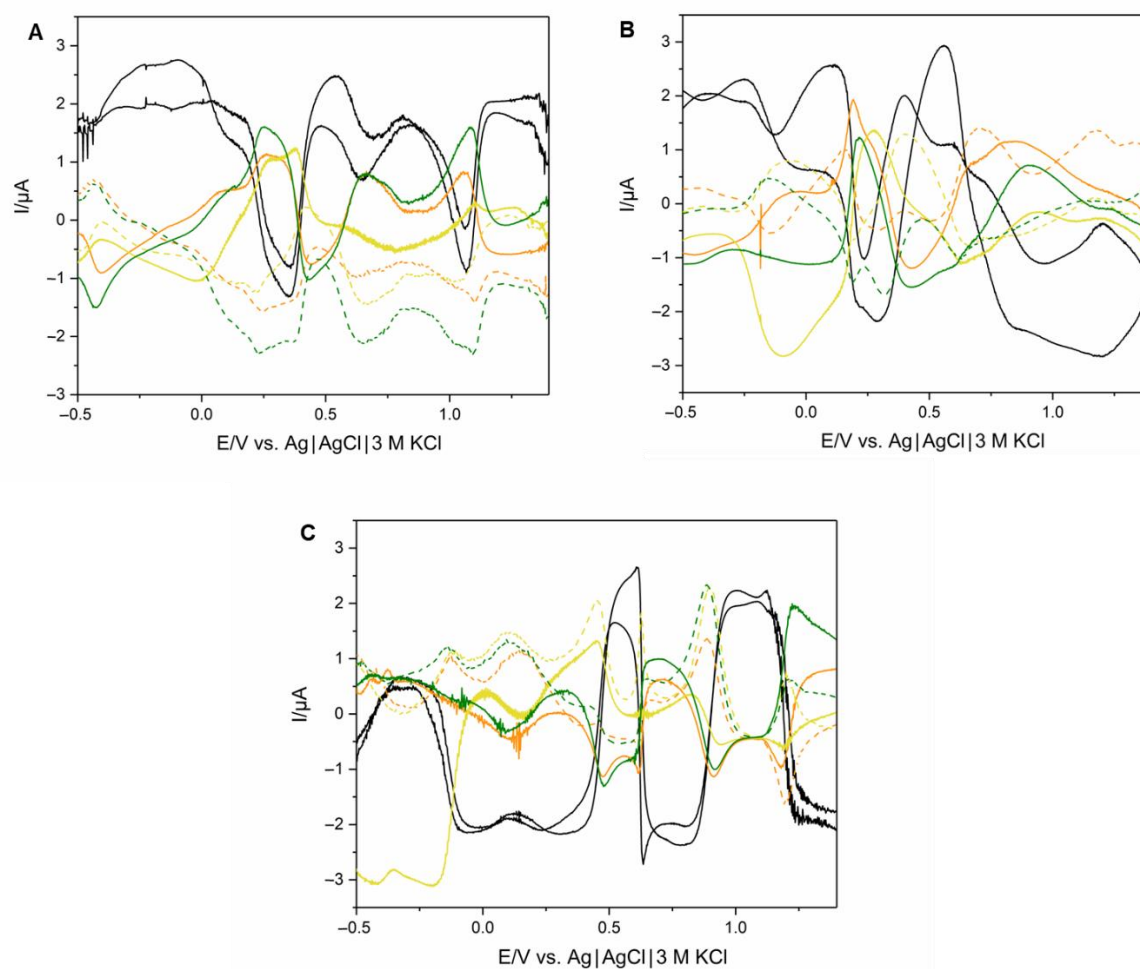

**Supporting Figure S7:** Normalized current response (subtracting the mean and dividing with the standard deviation) at each potential using the whole data set used for Fig. 4, (black = AUM; yellow = *K.pneumoniae*, green = *E.faecalis*, orange = *E.coli*, 1 h = dashed, 5 h = solid)) for the investigated electrode materials Pt (A), Pd (B), and Au (C)

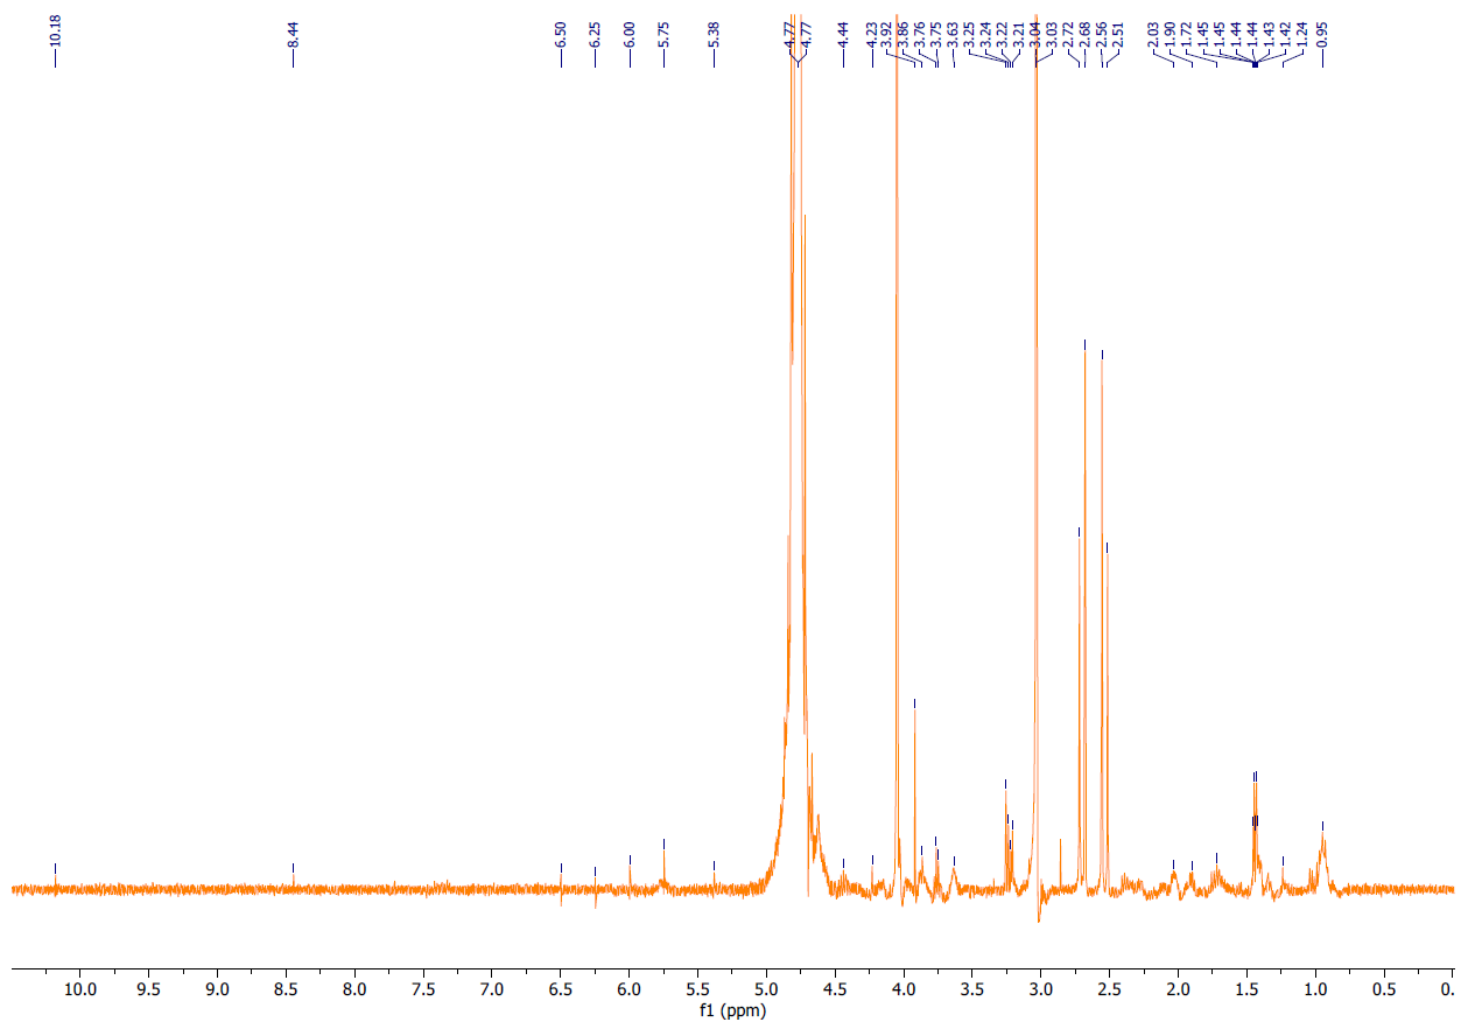

**Supporting Figure S8:**  $^1\text{H}$  NMR spectrum of *E. coli* in AUM after 5h of bacterial growth (reference peak. positioned at 4.05 ppm relative to TMS (0 ppm)).



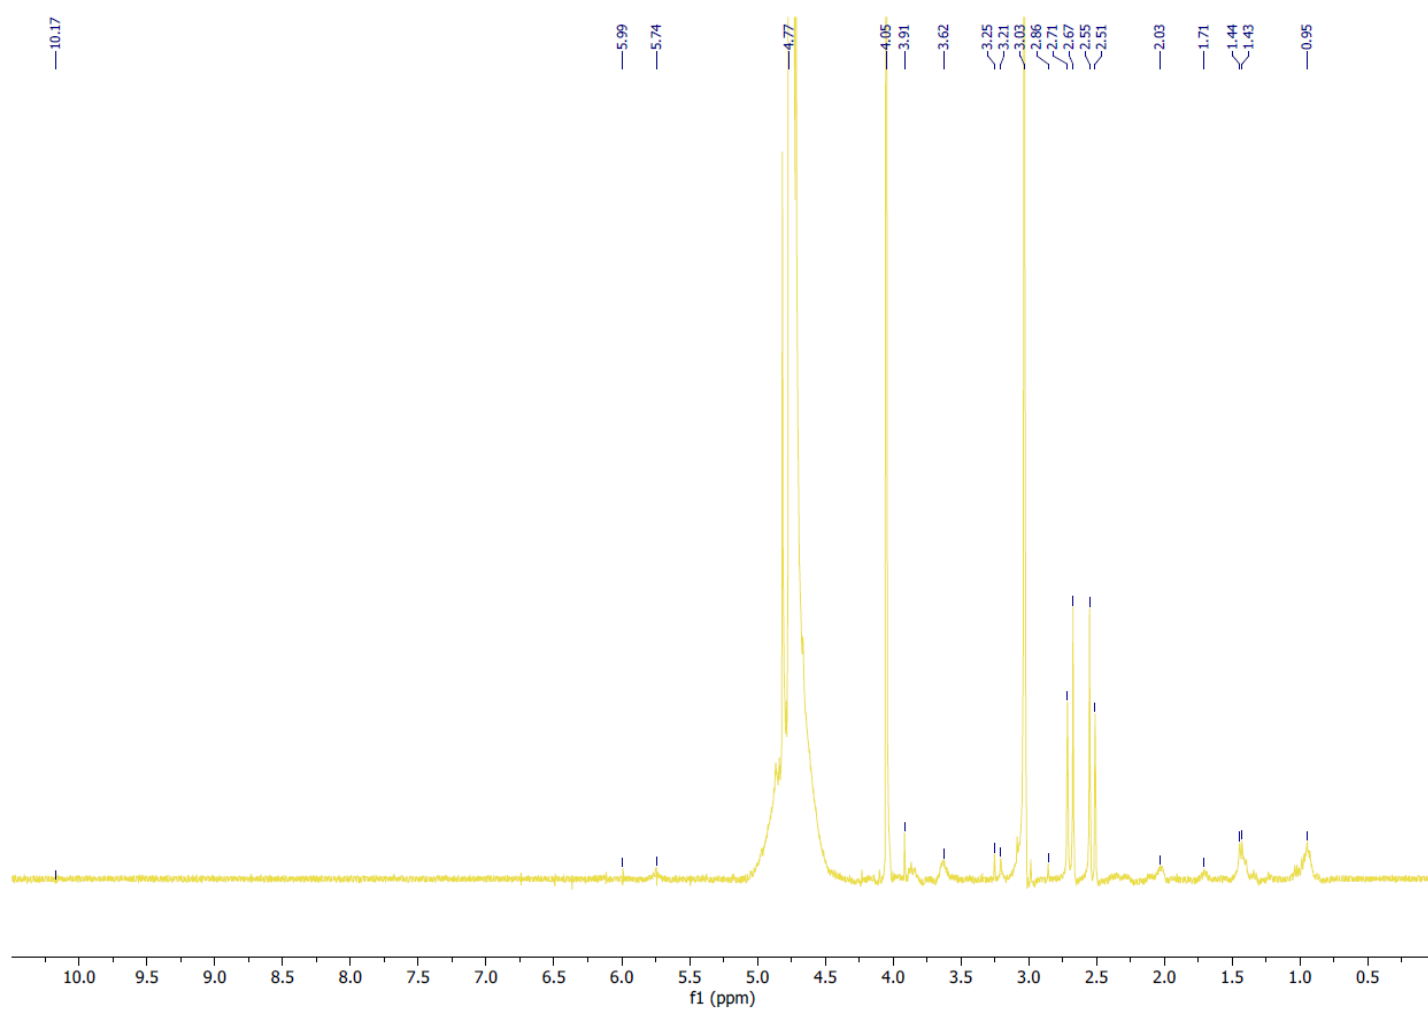

**Supporting Figure S9:**  $^1\text{H}$  NMR spectrum of *K.pneumoniae* in AUM after 5h of bacterial growth (reference peak. positioned at 4.05 ppm relative to TMS (0 ppm)).

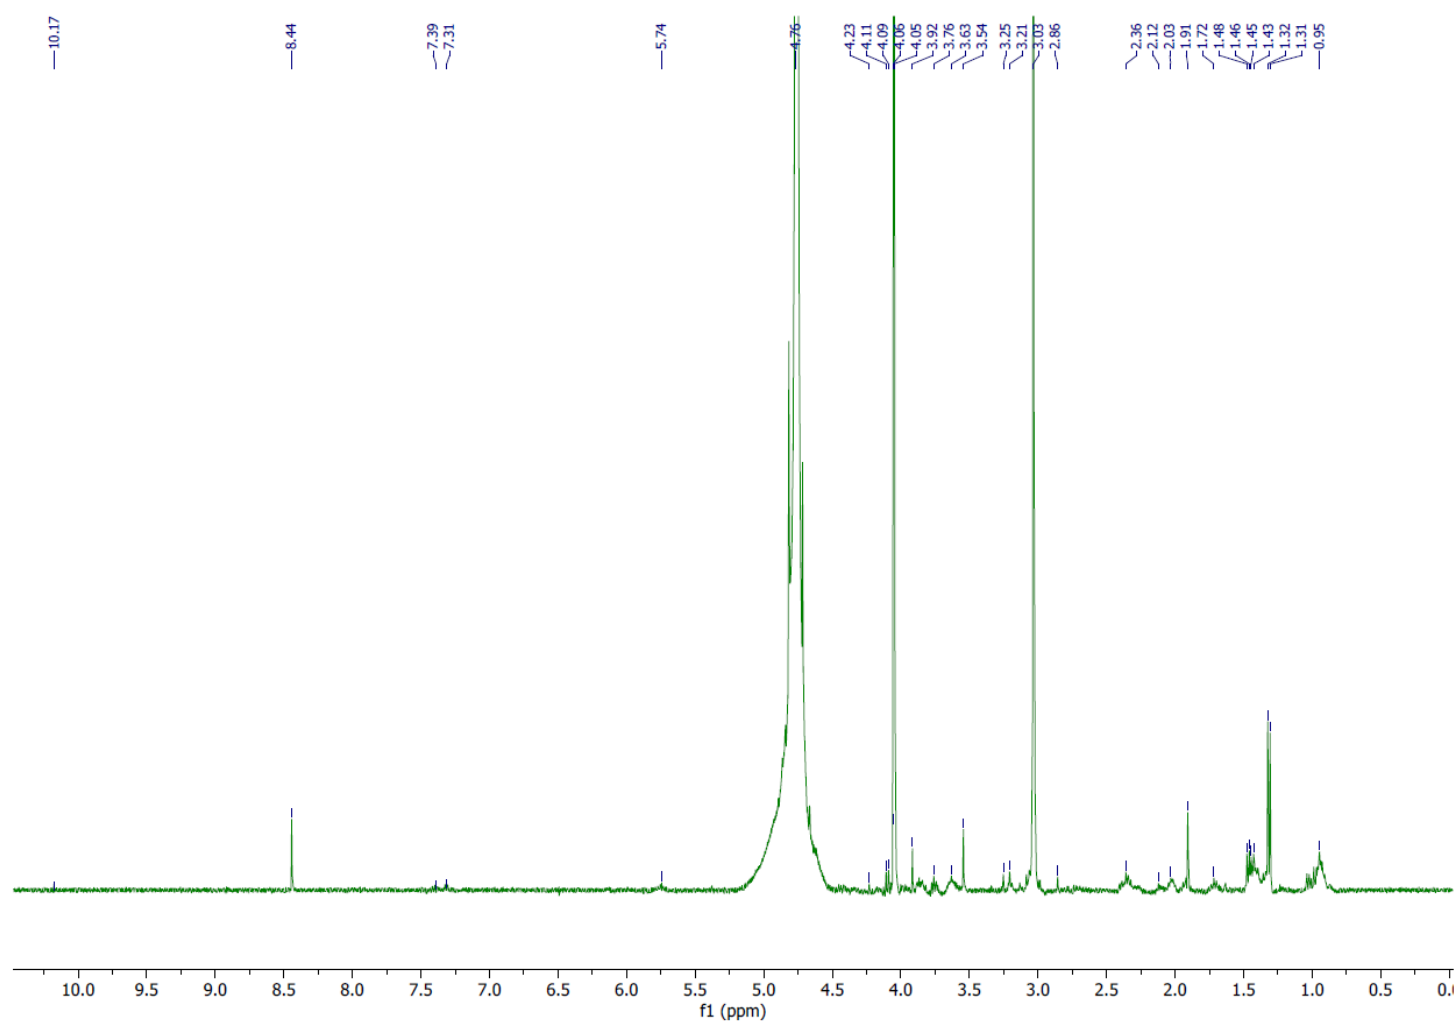

**Supporting Figure S10:**  $^1\text{H}$  NMR spectrum of *E. faecalis* in AUM after 5h of bacterial growth (reference peak. positioned at 4.05 ppm relative to TMS (0 ppm)).

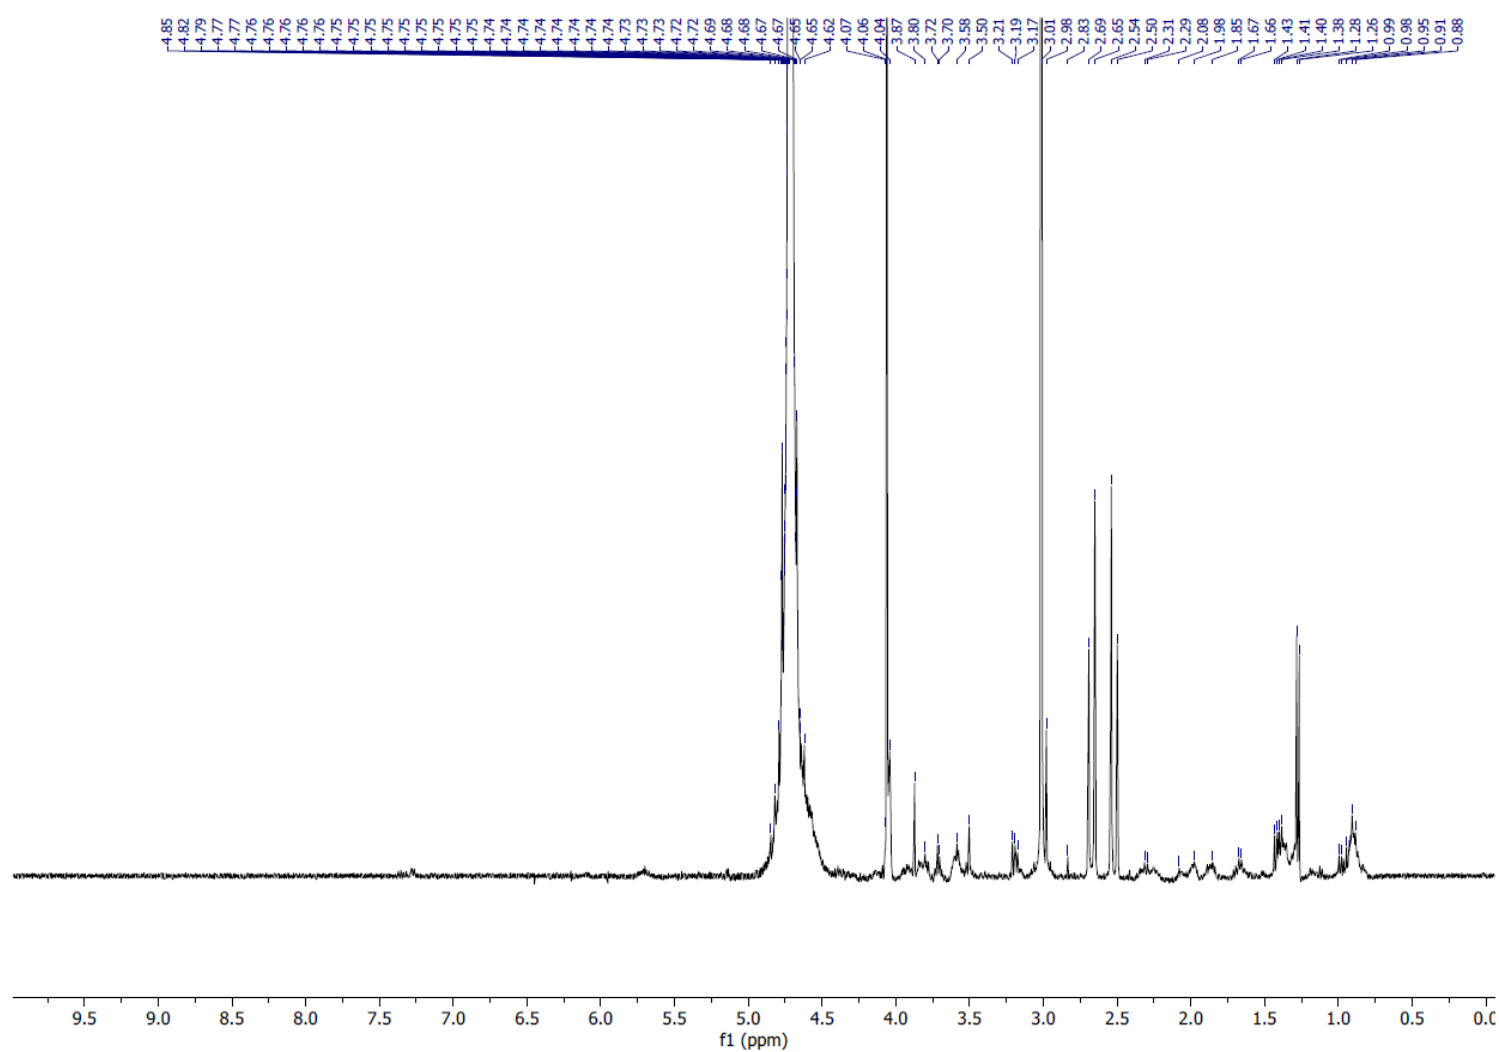

**Supporting Figure S11:**  $^1\text{H}$  NMR spectrum of AUM (reference peak, positioned at 4.05 ppm relative to TMS (0 ppm)).

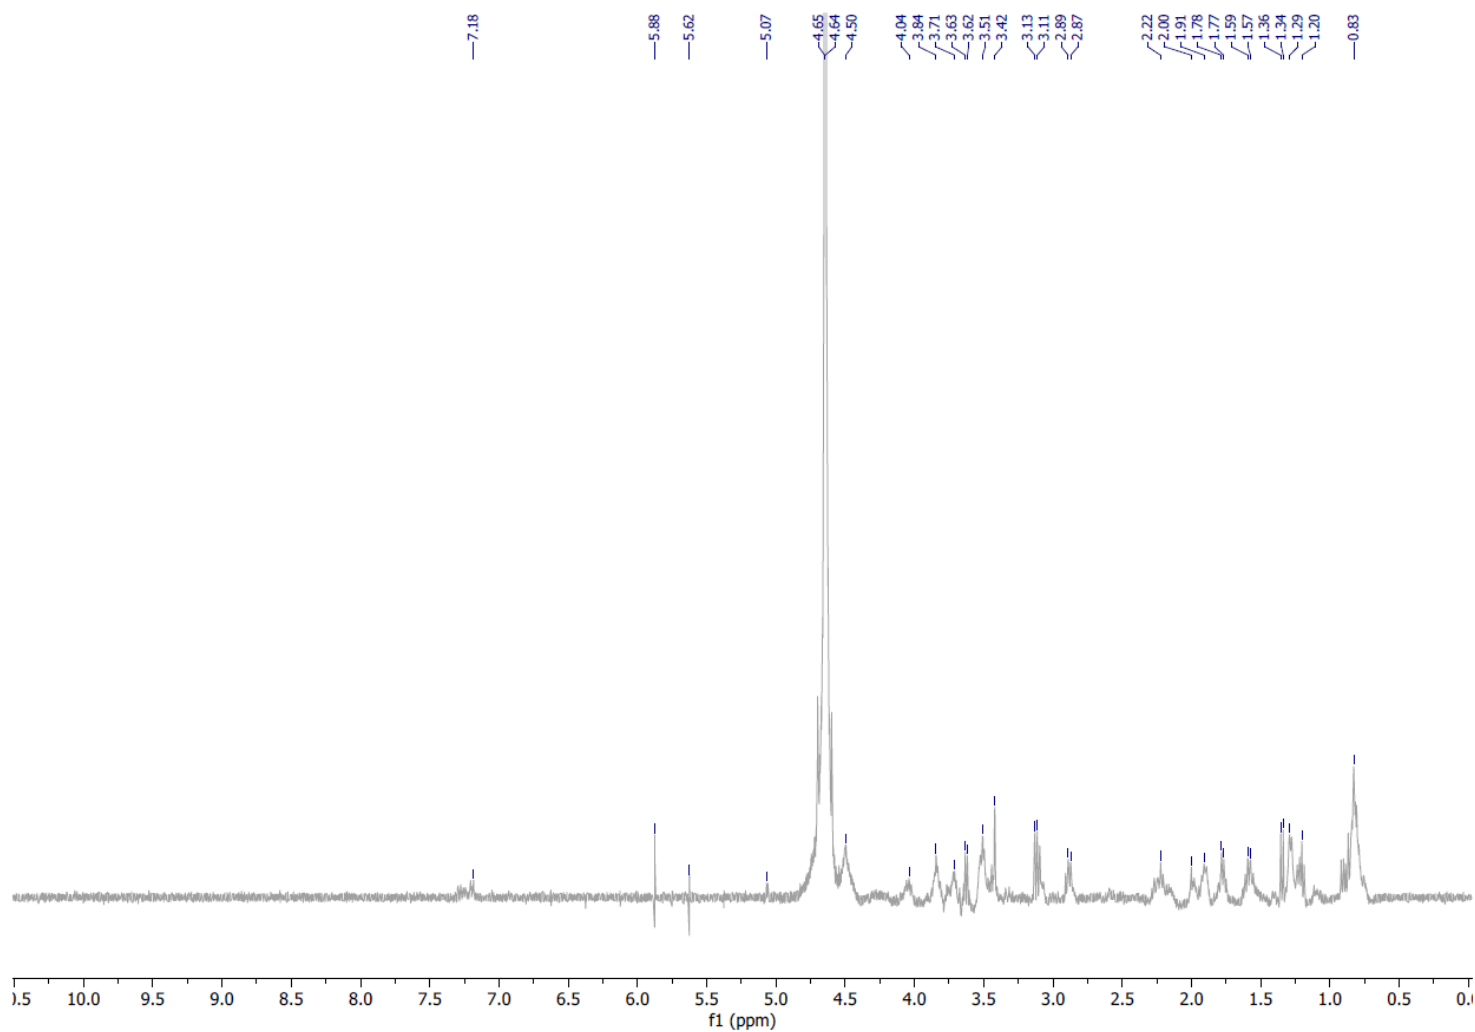

**Supporting Figure S12:** <sup>1</sup>H NMR spectrum of peptone in D<sub>2</sub>O (reference peak, positioned at 4.05 ppm relative to TMS (0 ppm)).



**Supporting Table S1:** Score values related to the PCA of AUM and AUM incubated with three types of bacteria.

| Sample name | Component 1 | Component 2 | Component 3 | Component 4 |
|-------------|-------------|-------------|-------------|-------------|
| ECfeac 1    | 0.174       | 0.554       | -0.586      | 0.034       |
| ECfeac 2    | 0.384       | 0.089       | 0.831       | -0.121      |
| ECfaec 3    | 0.006       | -0.171      | -0.267      | -0.939      |
| Ecoli 1     | 0.332       | 0.860       | -0.113      | 0.225       |
| Ecoli 2     | 0.311       | 0.875       | -0.096      | 0.212       |
| Ecoli 3     | 0.367       | 0.291       | 0.800       | -0.039      |
| Kleb 1      | 0.664       | -0.347      | -0.243      | 0.439       |
| Kleb2       | 0.724       | -0.500      | 0.025       | 0.345       |
| Kleb 3      | 0.773       | -0.463      | -0.071      | 0.300       |
| Aum1        | -0.910      | 0.009       | 0.240       | 0.276       |
| Aum2        | -0.885      | 0.038       | 0.187       | 0.328       |
| Aum 3       | -0.844      | -0.235      | -0.167      | 0.370       |

**Supporting Table S2:** Score values related to the PCA of *K.pneumoniae* at different incubation times.

| Sample name | Component 1 | Component 2 |
|-------------|-------------|-------------|
| Aum1        | -.906       | .336        |
| Aum2        | -.945       | .106        |
| Aum3        | -.806       | -.098       |
| 1h          | .712        | -.684       |
| 2h          | .948        | -.241       |
| 3h          | .925        | .205        |
| 4h          | .884        | .439        |
| 5h          | .733        | .633        |

**Supporting Table S3:** Score values related to the PCA of *E.faecalis* at different incubation times

| Sample name | Component 1 | Component 2 |
|-------------|-------------|-------------|
| Aum1        | -.902       | .314        |
| Aum2        | -.945       | .093        |
| Aum3        | -.842       | .018        |
| 1h          | .705        | -.697       |
| 2h          | .924        | -.134       |
| 3h          | .970        | .146        |
| 4h          | .792        | .512        |
| 5h          | .740        | .613        |

**Supporting Table S4:** Score values related to the PCA of *E.coli* at different incubation times.

| Sample name | Component 1 | Component 2 |
|-------------|-------------|-------------|
| Aum1        | -.893       | .240        |
| Aum2        | -.932       | .150        |
| Aum3        | -.902       | -.105       |
| 1h          | .795        | -.534       |
| 2h          | .903        | -.350       |
| 3h          | .748        | .344        |
| 4h          | .880        | .357        |
| 5h          | .767        | .559        |

**Supporting Table S5:** Score values related to the PCA of AUM and AUM incubated with three types of bacteria at different incubation times.

| Sample name | Component 1 | Component 2 | Component 3 | Component 4 |
|-------------|-------------|-------------|-------------|-------------|
| Aum 1       | -.946       | -.238       | .097        | -.120       |
| Aum2        | -.914       | -.324       | -.060       | -.110       |
| Aum3        | -.834       | -.419       | -.160       | .089        |
| Ecoli 1h    | .595        | -.104       | -.628       | .408        |
| Ecoli 2h    | .716        | -.221       | -.411       | .458        |
| Ecoli 3h    | .525        | -.428       | .178        | .383        |
| Ecoli 4h    | .718        | -.387       | .304        | .375        |
| Ecoli 5h    | .591        | -.353       | .611        | .193        |
| Kleb 1h     | .235        | .576        | -.691       | -.202       |
| Kleb2h      | .162        | .883        | -.285       | .010        |
| Kleb 3h     | .018        | .918        | .238        | .221        |
| Kleb 4h     | .013        | .868        | .419        | .211        |
| Kleb 5h     | -.092       | .768        | .433        | .154        |
| ECfeac 1h   | .491        | .041        | -.788       | -.301       |
| ECfeac 2h   | .765        | -.096       | -.362       | -.421       |
| ECfaec 3h   | .889        | -.066       | .091        | -.380       |
| ECfaec 4h   | .588        | -.072       | .605        | -.408       |
| ECfaec 5h   | .494        | -.038       | .740        | -.390       |
